# Supplementary material
Source: MDPI journal article supplement (https://www.mdpi.com/2073-4441/10/5/600)
Supplement: s1 [file s1]

# Ecological Flow Assessment to Improve the Spawning Habitat for the Four Major Species of Carps of the Yangtze River: A Study on Habitat Suitability Based on Ultrasonic Telemetry

## Supplementary Materials

**Table S1.** Summary of acoustic monitoring data for tagged four major Chinese carps during ecological operation.

| Tag no. | Date    | Time (o'clock) | VR2W no. | Tag no. | Date    | Time (o'clock) | VR2W no. |
|---------|---------|----------------|----------|---------|---------|----------------|----------|
| 55185   | June 8  | 2              | ZC12     | 34545   | June 12 | 8              | YD04     |
| 55185   | June 8  | 6              | ZC11     | 55174   | June 12 | 8              | ZC09     |
| 55185   | June 8  | 6              | ZC10     | 55175   | June 12 | 8              | ZC01     |
| 55185   | June 8  | 7              | ZC09     | 55175   | June 12 | 8              | ZC02     |
| 55185   | June 8  | 12             | ZC05     | 55175   | June 12 | 8              | ZC03     |
| 55185   | June 8  | 14             | ZC03     | 55135   | June 12 | 9              | YD07     |
| 55185   | June 8  | 15             | ZC02     | 55175   | June 12 | 10             | ZC05     |
| 55185   | June 8  | 16             | ZC01     | 55175   | June 12 | 10             | ZC07     |
| 55174   | June 8  | 18             | ZC11     | 34555   | June 12 | 11             | YD07     |
| 55185   | June 8  | 21             | ZC02     | 34555   | June 12 | 12             | YD04     |
| 55185   | June 8  | 23             | ZC03     | 34555   | June 12 | 12             | YD03     |
| 55174   | June 9  | 1              | ZC10     | 34555   | June 12 | 14             | YD02     |
| 34554   | June 9  | 1              | ZC03     | 55178   | June 12 | 23             | YD07     |
| 55174   | June 9  | 5              | ZC11     | 34558   | June 20 | 16             | YD02     |
| 55185   | June 9  | 6              | ZC02     | 55153   | June 20 | 17             | YD04     |
| 55185   | June 9  | 7              | ZC01     | 55153   | June 20 | 19             | YD02     |
| 55174   | June 9  | 17             | ZC10     | 34559   | June 20 | 23             | YD07     |
| 34554   | June 10 | 1              | ZC02     | 34559   | June 21 | 2              | YD02     |
| 55179   | June 10 | 2              | YD06     | 34559   | June 21 | 6              | YD06     |
| 34554   | June 10 | 3              | ZC02     | 55146   | June 21 | 8              | YD03     |
| 55174   | June 10 | 4              | ZC09     | 55164   | June 21 | 11             | YD06     |
| 34545   | June 10 | 7              | ZC05     | 55164   | June 21 | 15             | YD05     |
| 55191   | June 10 | 13             | YD06     | 34545   | June 22 | 0              | YD06     |
| 55191   | June 10 | 13             | YD05     | 34545   | June 22 | 1              | YD05     |
| 55191   | June 10 | 15             | YD04     | 34545   | June 22 | 2              | YD03     |
| 34559   | June 10 | 22             | YD07     | 34558   | June 22 | 3              | ZC02     |
| 34559   | June 10 | 23             | YD05     | 34558   | June 22 | 4              | ZC03     |
| 34559   | June 11 | 1              | YD03     | 34558   | June 22 | 5              | ZC01     |
| 34559   | June 11 | 2              | YD02     | 34567   | June 22 | 5              | ZC03     |
| 34559   | June 11 | 3              | YD01     | 34541   | June 22 | 6              | ZC03     |
| 55178   | June 11 | 3              | ZC13     | 55195   | June 22 | 10             | YD05     |
| 55146   | June 11 | 11             | ZC03     | 55195   | June 22 | 12             | YD03     |
| 55146   | June 11 | 12             | ZC11     | 34545   | June 22 | 21             | YD06     |
| 55146   | June 11 | 12             | ZC10     | 34545   | June 23 | 0              | YD05     |
| 55146   | June 11 | 14             | ZC08     | 55175   | June 23 | 1              | ZC12     |
| 55143   | June 11 | 15             | YD08     | 34541   | June 23 | 3              | ZC05     |
| 55143   | June 11 | 16             | YD06     | 55175   | June 23 | 4              | ZC07     |
| 55143   | June 11 | 17             | YD07     | 34545   | June 23 | 5              | YD03     |

|       |         |    |      |       |         |    |      |
|-------|---------|----|------|-------|---------|----|------|
| 55143 | June 11 | 19 | YD04 | 55175 | June 23 | 5  | ZC05 |
| 34555 | June 12 | 0  | ZC01 | 55175 | June 23 | 6  | ZC03 |
| 55160 | June 12 | 3  | YD07 | 55175 | June 23 | 6  | ZC02 |
| 55175 | June 12 | 4  | YD02 | 55175 | June 23 | 7  | ZC01 |
| 55175 | June 12 | 4  | YD04 | 34545 | June 23 | 11 | YD01 |
| 55143 | June 12 | 5  | ZC10 | 55175 | June 23 | 16 | YD08 |
| 55160 | June 12 | 5  | YD04 | 34551 | June 23 | 17 | ZC08 |
| 55175 | June 12 | 5  | YD08 | 34551 | June 23 | 18 | ZC07 |
| 34545 | June 12 | 6  | YD05 | 55175 | June 23 | 18 | YD06 |
| 34545 | June 12 | 6  | YD06 | 34558 | June 23 | 19 | YD06 |
| 55174 | June 12 | 6  | ZC10 | 55175 | June 23 | 19 | YD05 |
| 55174 | June 12 | 6  | ZC11 | 34551 | June 23 | 20 | ZC05 |
| 34545 | June 12 | 7  | YD03 | 34558 | June 23 | 20 | YD05 |
| 55160 | June 12 | 7  | YD02 | 55175 | June 23 | 21 | YD03 |
| 55160 | June 12 | 7  | YD01 | 34551 | June 23 | 23 | ZC03 |

Table S2. Daily spawning egg numbers and WUA at Yidu spawning ground.

| Date          | Flow (m <sup>3</sup> /s) | WUA (km <sup>2</sup> ) | Daily spawning egg numbers (×10 <sup>8</sup> ) |
|---------------|--------------------------|------------------------|------------------------------------------------|
| May 9, 2015   | 11100                    | 6.2866                 | 0.008                                          |
| May 12, 2015  | 11400                    | 6.3316                 | 0.027                                          |
| May 16, 2015  | 11800                    | 6.3860                 | 0.044                                          |
| May 18, 2015  | 11500                    | 6.3458                 | 0.065                                          |
| May 19, 2015  | 9770                     | 6.0437                 | 0.051                                          |
| May 21, 2015  | 10100                    | 6.1106                 | 0.013                                          |
| May 29, 2015  | 14250                    | 6.5795                 | 0.031                                          |
| May 30, 2015  | 13150                    | 6.5223                 | 0.756                                          |
| June 1, 2015  | 12650                    | 6.4803                 | 0.013                                          |
| June 3, 2015  | 7530                     | 5.4747                 | 0.131                                          |
| June 8, 2015  | 14400                    | 6.5836                 | 0.043                                          |
| June 9, 2015  | 19700                    | 6.1490                 | 2.251                                          |
| June 10, 2015 | 19750                    | 6.1395                 | 0.114                                          |
| June 18, 2015 | 21700                    | 5.6930                 | 0.547                                          |
| June 21, 2015 | 20100                    | 6.0706                 | 0.062                                          |
| June 22, 2015 | 16050                    | 6.5687                 | 0.016                                          |
| June 27, 2015 | 26750                    | 3.8295                 | 1.523                                          |
| June 30, 2015 | 26750                    | 3.8295                 | 0.016                                          |
| July 1, 2015  | 32600                    | 0.3956                 | 0.186                                          |
| July 2, 2015  | 31500                    | 1.1458                 | 0.126                                          |
| May 22, 2017  | 14300                    | 6.5810                 | 0.050                                          |
| May 24, 2017  | 16400                    | 6.5516                 | 0.011                                          |
| June 1, 2017  | 13900                    | 6.5666                 | 0.031                                          |
| June 8, 2017  | 19000                    | 6.2708                 | 0.017                                          |
| June 10, 2017 | 19600                    | 6.1676                 | 3.323                                          |
| June 11, 2017 | 15100                    | 6.5906                 | 0.397                                          |
| June 18, 2017 | 22500                    | 5.4658                 | 1.991                                          |
| June 19, 2017 | 22100                    | 5.5826                 | 0.346                                          |
| June 25, 2017 | 17900                    | 6.4226                 | 1.150                                          |
| June 28, 2017 | 24800                    | 4.6700                 | 0.992                                          |
| July 9, 2017  | 27600                    | 3.4156                 | 0.858                                          |
| July 10, 2017 | 26100                    | 4.1266                 | 0.632                                          |
